# Supplementary material for: Epinephrine Improves the Efficacy of Nebulized Hypertonic Saline in Moderate Bronchiolitis: A Randomised Clinical Trial
Source: PubMed Central journal article supplement (PMC4648584; doi:10.1371/journal.pone.0142847), 2015-11-17

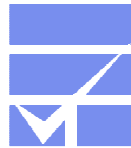

# CONSORT

TRANSPARENT REPORTING of TRIALS

## CONSORT 2010 Flow Diagram

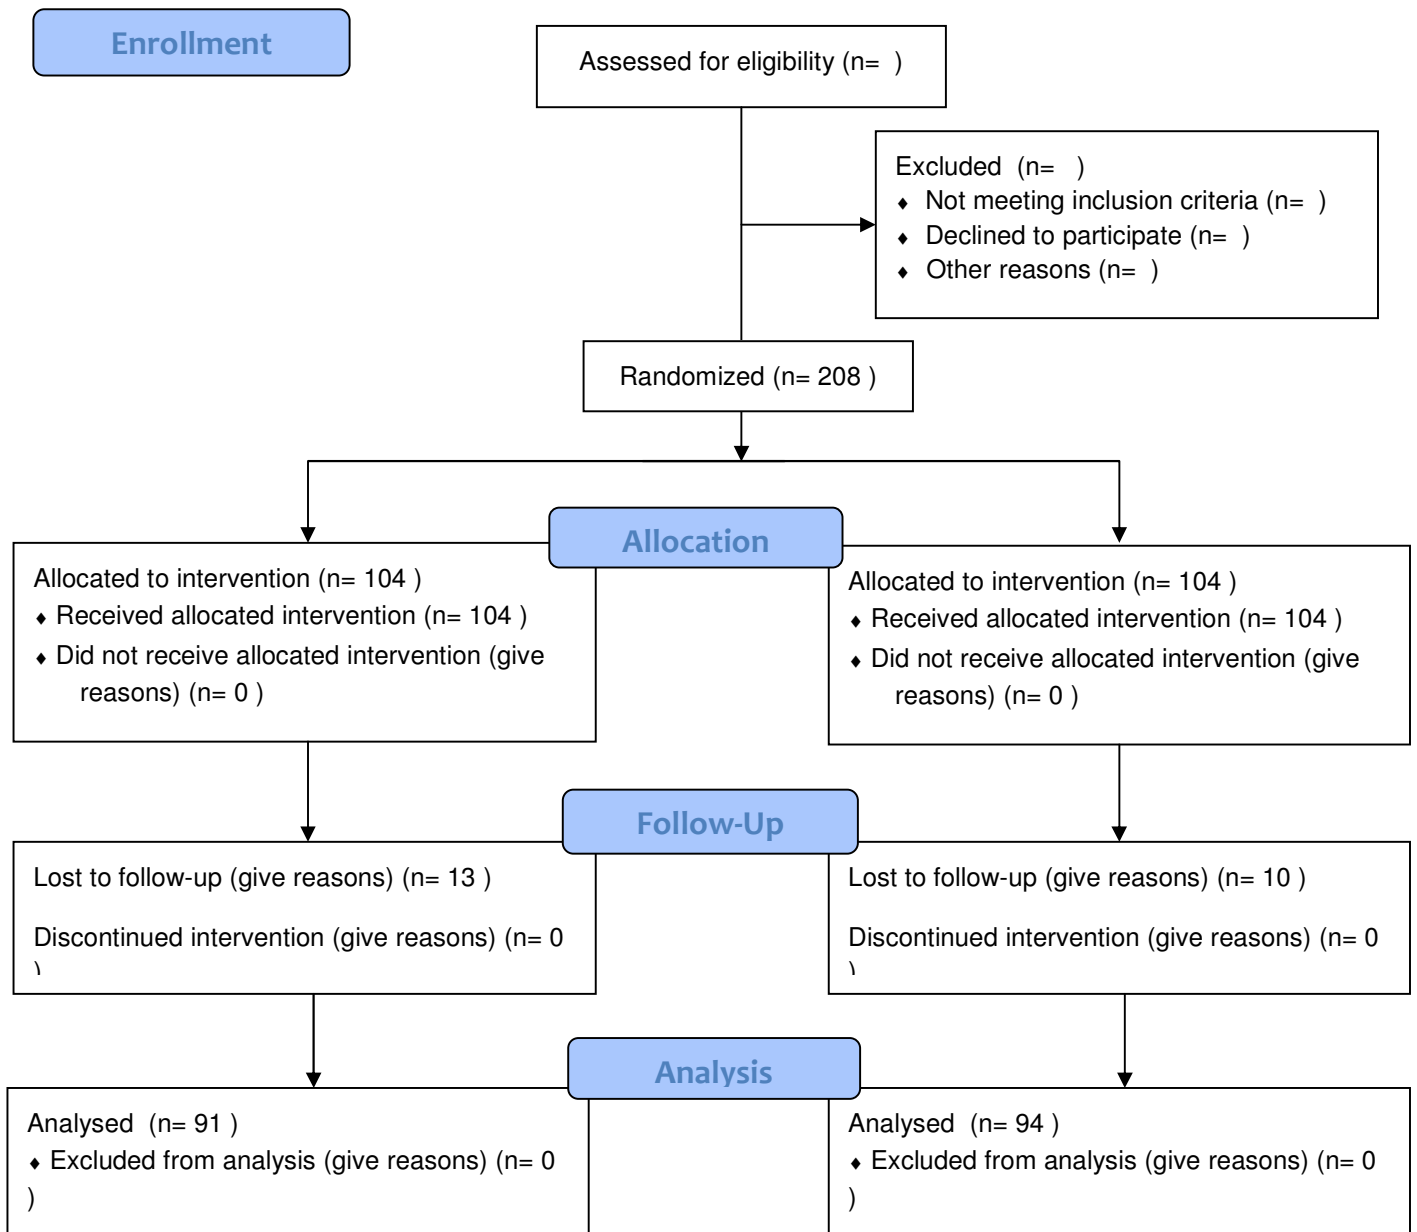

Supplement: pone.0142847.s003.pdf [file pone.0142847.s003.pdf]
